# Supplementary material for: Structure–activity relationship study for design of highly active covalent peroxidase-mimicking DNAzyme
Source: Royal Society of Chemistry journal article supplement (doi:10.1039/c5ra03167b), 2015-01-01
Supplement: c5ra03167b1.pdf [file c5ra03167b1.pdf]

Table 1S. Characterization of covalent hemin-EAD2 conjugates by mass-spectrometry.

| N/N | Conjugate*<br>5' → 3'         | Mr (calculated) | Mr (experimental) |
|-----|-------------------------------|-----------------|-------------------|
| 1   | Hemin-T <sub>15</sub> -EAD2   | 11075.9         | 11067.4           |
| 2   | Hemin-T <sub>10</sub> -EAD2   | 9554.9          | 9548.1            |
| 3   | Hemin-T <sub>5</sub> -EAD2    | 8033.9          | 8027.8            |
| 4   | Hemin-EAD2                    | 6512.9          | 6507.5            |
| 5   | EAD2-T <sub>15</sub> -Hemin   | 11105.8         | 11097.3           |
| 6   | EAD2-T <sub>10</sub> -Hemin   | 9584.9          | 9578.1            |
| 7   | EAD2-T <sub>5</sub> -Hemin    | 8063.9          | 8057.8            |
| 8   | EAD2-Hemin                    | 6542.9          | 6537.5            |
| 9   | Hemin-Prd <sub>10</sub> -EAD2 | 7893.5          | 7887.6            |
| 10  | EAD2-Prd <sub>10</sub> -Hemin | 7893.5          | 7887.7            |

\*Symbol d in the notation of oligothymidilate spacers is omitted.

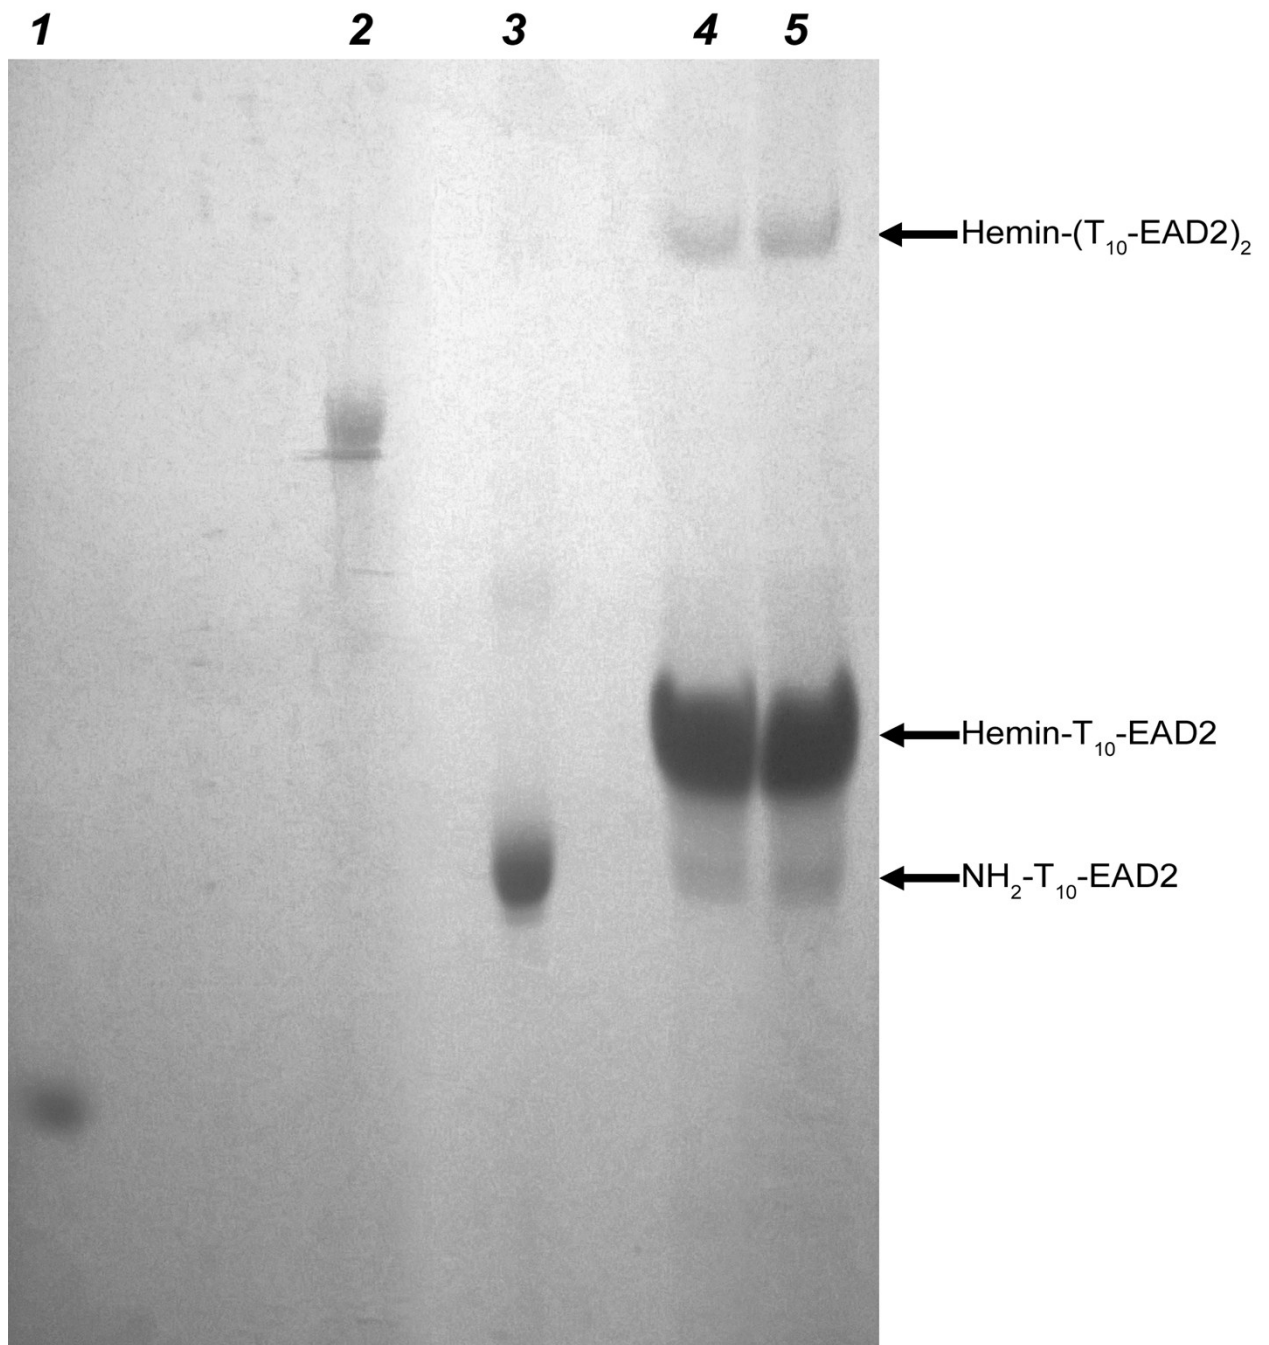

Figure S1. Purification of PMDNAzyme( $\text{T}_{10}$ ) by gel electrophoresis in 20% PAAG, 7 M urea with UV visualization. Lanes: **1** - xylene cyanol marker; **2** – random 40-mer DNA as a length control; **3** - initial  $\text{NH}_2\text{-T}_{10}\text{-EAD2}$ ; **4,5** - products of hemin conjugation to  $\text{NH}_2\text{-T}_{10}\text{-EAD2}$ . Only conjugate hemin- $\text{T}_{10}\text{-EAD2}$  was isolated from the gel.

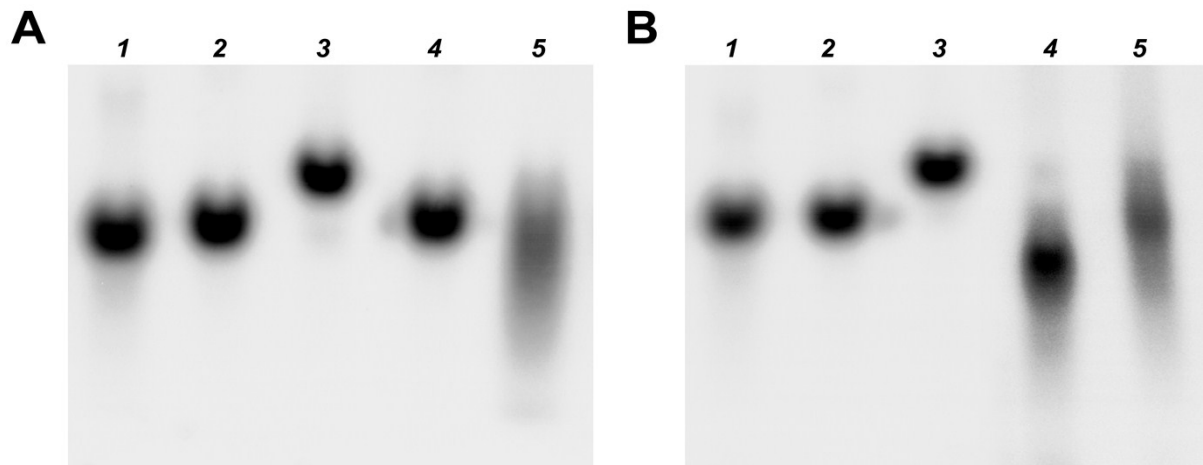

Figure 2S. Analysis of the electrophoretic mobility of EAD2-T<sub>10</sub>-Hemin and EAD2-T<sub>10</sub>-NH<sub>2</sub> in the presence of 200 mM CH<sub>3</sub>COONa (**A**) or 200 mM CH<sub>3</sub>COONa and 20 mM CH<sub>3</sub>COOK (**B**). Lanes: *1* - control random DNA 25-mer, *2* - 28-mer, *3* - 35-mer, *4* - EAD2-dT<sub>10</sub>-NH<sub>2</sub>, *5* - EAD2-dT<sub>10</sub>-Hemin. All oligonucleotides were 5'-end <sup>32</sup>P-labelled. A blurred band in the lane 5 (**A**) may result from a partial destruction of the quadruplex structure under nonequilibrium electrophoresis conditions. Electrophoresis was performed in 20% acrylamide native gels at 4°C in 100 mM TBE (Tris/boric acid/EDTA) buffer, pH 8.0.

**Optimization of experimental conditions for chemiluminescent determination of PMDNAzyme(T<sub>10</sub>) measured towards luminol.**

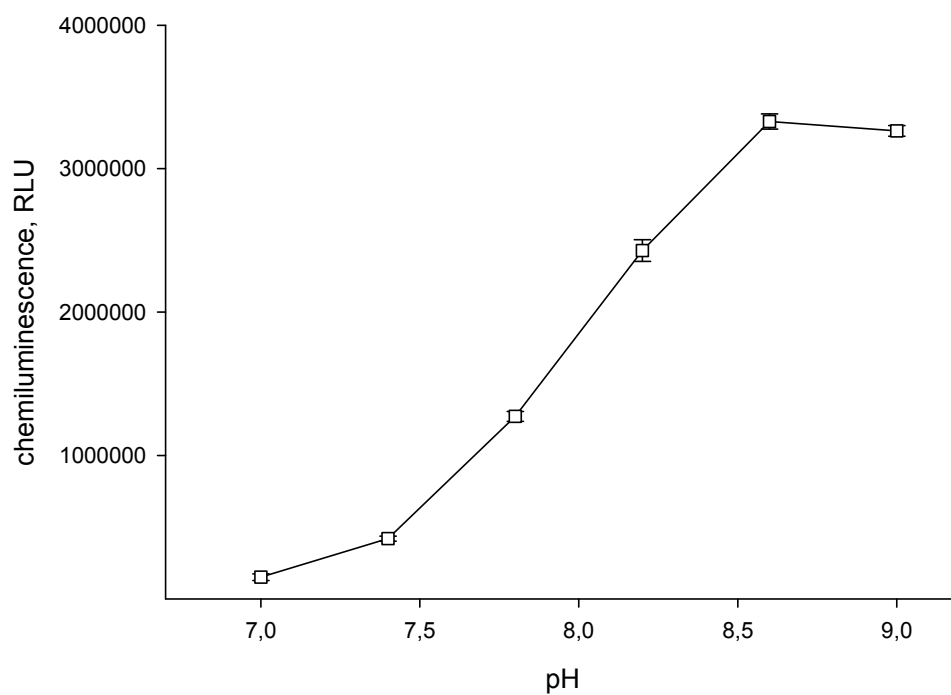

Figure S3. pH-Dependence of activity of PMDNAzyme(T<sub>10</sub>) measured towards luminol. Experimental conditions: 25 mM Tris buffer with 20 mM KCl, 200 mM NaCl, and 0.1% Triton X100; [H<sub>2</sub>O<sub>2</sub>] = 1.3 mM; [luminol] = 5 μM; [PMDNAzyme(T<sub>10</sub>)] = 6 x 10<sup>-8</sup> M.

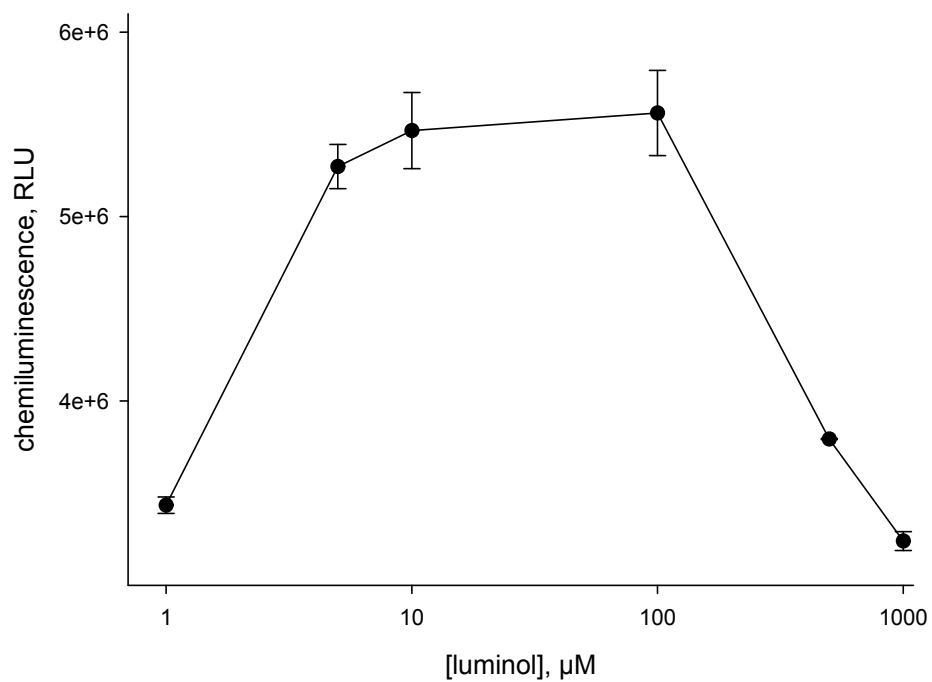

Figure S4. Effect of luminol concentration on chemiluminescence intensity produced upon PMDNAzyme(T<sub>10</sub>) -catalyzed oxidation of luminol. Experimental conditions: 25 mM Tris buffer, pH 8.6 with 20 mM KCl, 200 mM NaCl, and 0.1% Triton X100; [H<sub>2</sub>O<sub>2</sub>] = 1.3 mM; [PMDNAzyme(T<sub>10</sub>)] = 6 x 10<sup>-8</sup> M.

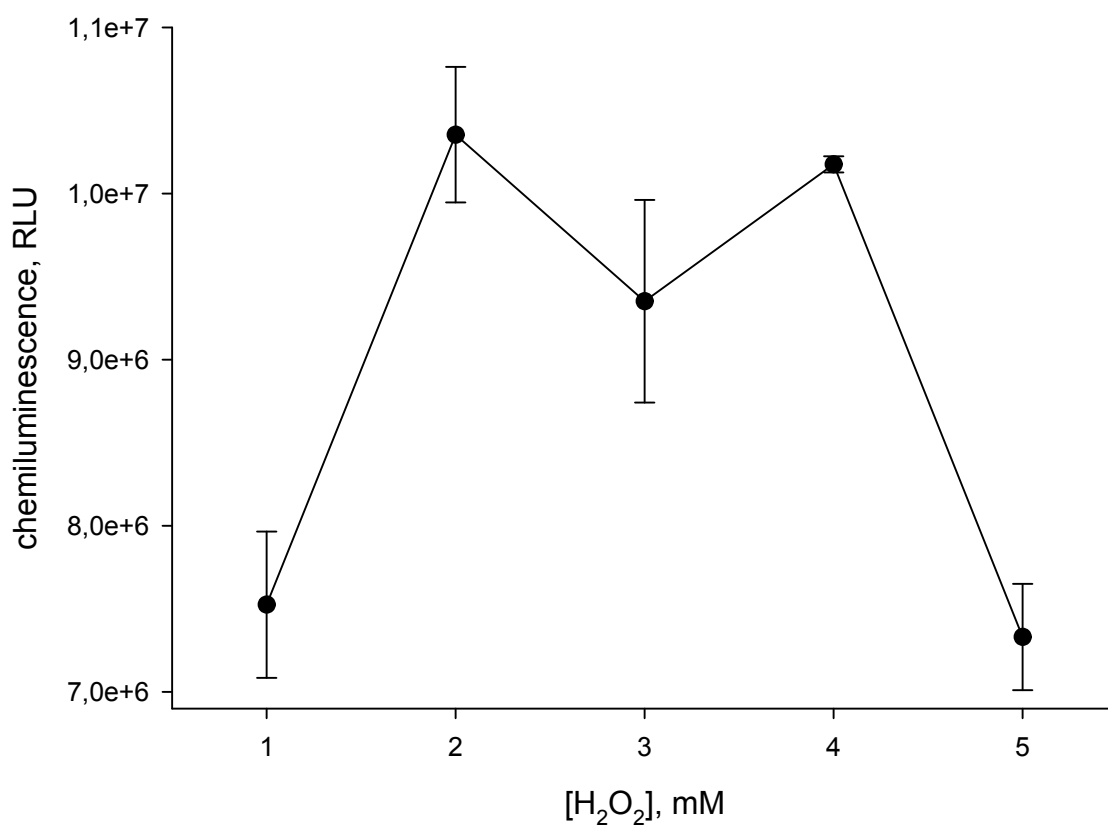

Figure S5. Effect of hydrogen peroxide concentration on chemiluminescence intensity produced upon PMDNAzyme( $T_{10}$ )-catalyzed oxidation of luminol. Experimental conditions: 25 mM Tris buffer, pH 8.6 with 20 mM KCl, 200 mM NaCl, and 0.1% Triton X100; [luminol] = 5  $\mu\text{M}$ ; [PMDNAzyme( $T_{10}$ )] =  $4 \times 10^{-8}$  M.

**Optimization of experimental conditions for colorimetric determination of PMDNAzyme(T<sub>10</sub>) measured towards ABTS.**

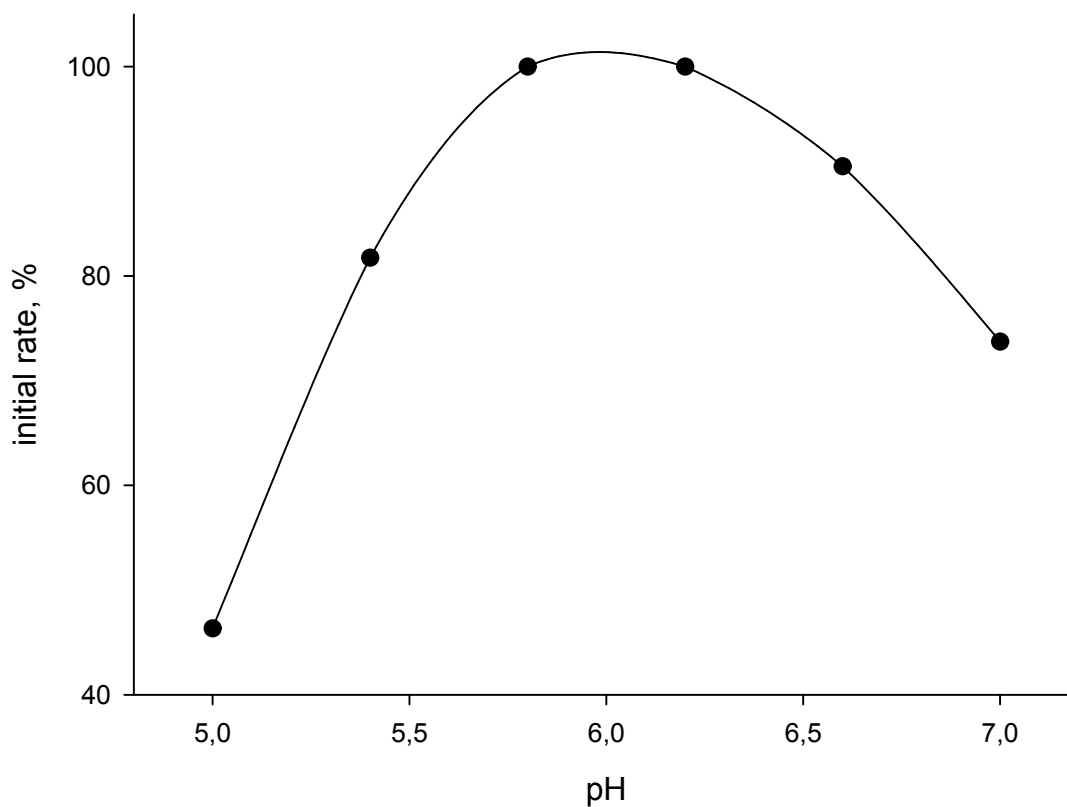

Figure S6. Dependence of initial rate of PMDNAzyme(T<sub>10</sub>)-catalyzed oxidation of ABTS as a function of pH. Experimental conditions: 25 mM citrate-phosphate buffer with 20 mM KCl, 200 mM NaCl, and 0.1% Triton X100; [H<sub>2</sub>O<sub>2</sub>] = 3 mM; [ABTS] = 3mM; [PMDNAzyme(T<sub>10</sub>)] = 3 x 10<sup>-8</sup> M.

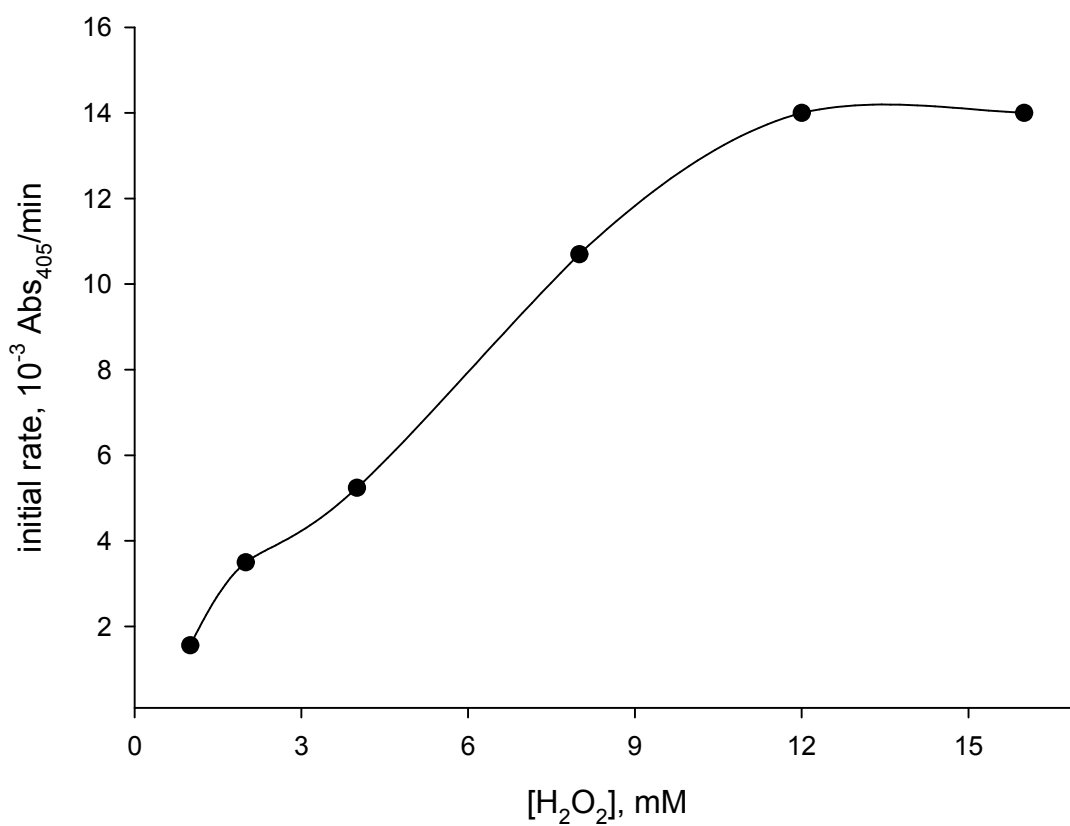

Figure S7. Dependence of initial rate of PMDNAzyme(T<sub>10</sub>)-catalyzed oxidation of ABTS on concentration of hydrogen peroxide. Experimental conditions: 25 mM citrate-phosphate buffer, pH 6.0 with 20 mM KCl, 200 mM NaCl, and 0.1% Triton X100; [ABTS] = 3mM; [PMDNAzyme(T<sub>10</sub>)] = 1 x 10<sup>-7</sup> M.



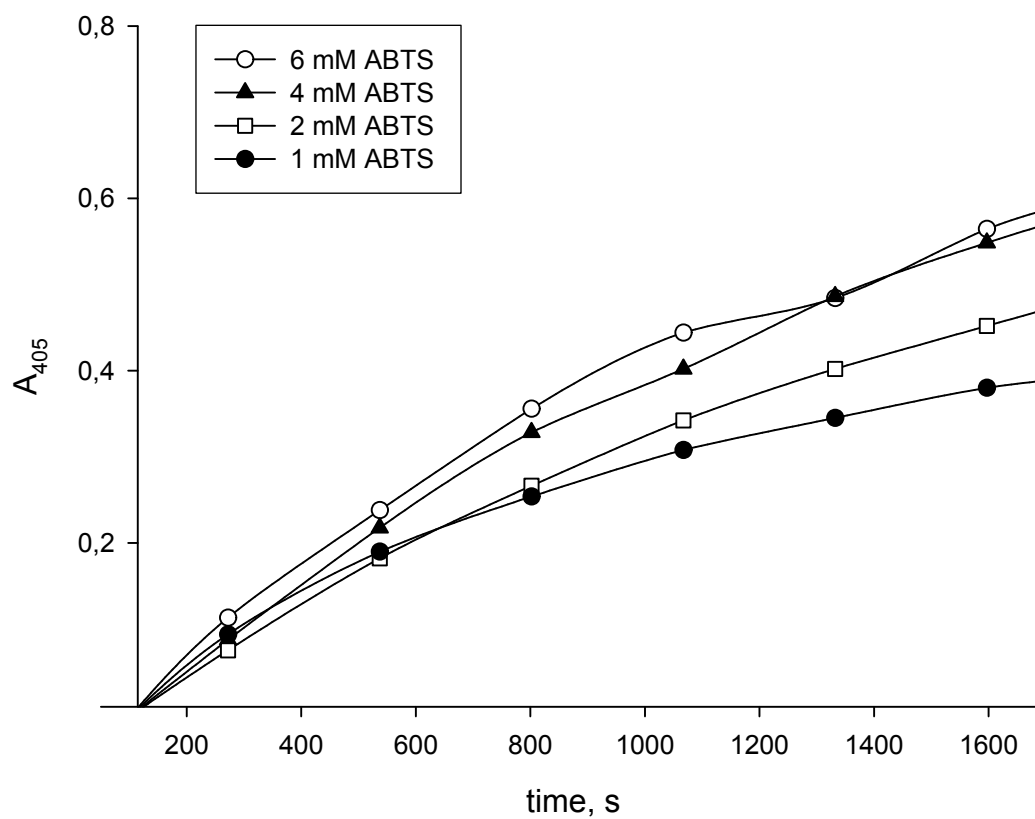

Figure S8. Kinetics of PMDNAzyme( $T_{10}$ )-catalyzed oxidation of ABTS in the presence of different ABTS concentration. Experimental conditions: 25 mM citrate-phosphate buffer, pH 6.0 with 20 mM KCl, 200 mM NaCl, and 0.1% Triton X100;  $[H_2O_2] = 12$  mM;  $[PMDNAzyme(T_{10})] = 1 \times 10^{-7}$  M.
